# Supplementary material for: Combined Exposure to Multiple Metals and Kidney Function in a Midlife and Elderly Population in China: A Prospective Cohort Study
Source: MDPI journal article supplement (doi:10.3390/toxics11030274), 2023-03-17
Supplement: s1 [file s1]

# **Combined exposure to multiple metals and kidney function in a midlife and elderly population in China: a prospective cohort study**

Tian-Ci Wang<sup>1#</sup>, Li-Ming Zhang<sup>2#</sup>, Yu-Jie Liu<sup>1</sup>, Jian Li<sup>2</sup>, Guo-Chong Chen<sup>1</sup>, Hui Zhou<sup>3</sup>, Lu-Gang Yu<sup>3</sup>, Zhong-Xiao Wan<sup>1</sup>, Chen Dong<sup>1</sup>, Li-Qiang Qin<sup>1\*</sup>, Jing-Si Chen<sup>1\*</sup>

<sup>1</sup>Department of Nutrition and Food Hygiene, School of Public Health, Suzhou Medical College of Soochow University, Suzhou, China.

<sup>2</sup>Suzhou Municipal Center for Disease Control and Prevention, Suzhou, China.

<sup>3</sup>Suzhou Industrial Park Centers for Disease Control and Prevention, Suzhou, China.

#Both authors contributed equally to this work

## **\*Corresponding to:**

Li-Qiang Qin, MD, PhD

Department of Nutrition and Food Hygiene, Suzhou Medical College of Soochow University, 199 Ren'ai Road, Suzhou 215123, China. Tel: 86-512-6588-0075; Fax: 86-512-6588-0050; Email: qinliqiang@suda.edu.cn

or

Jing-Si Chen, PhD

Department of Nutrition and Food Hygiene, Suzhou Medical College of Soochow University, 199 Ren'ai Road, Suzhou 215123, China. Email: jschen1993@suda.edu.cn

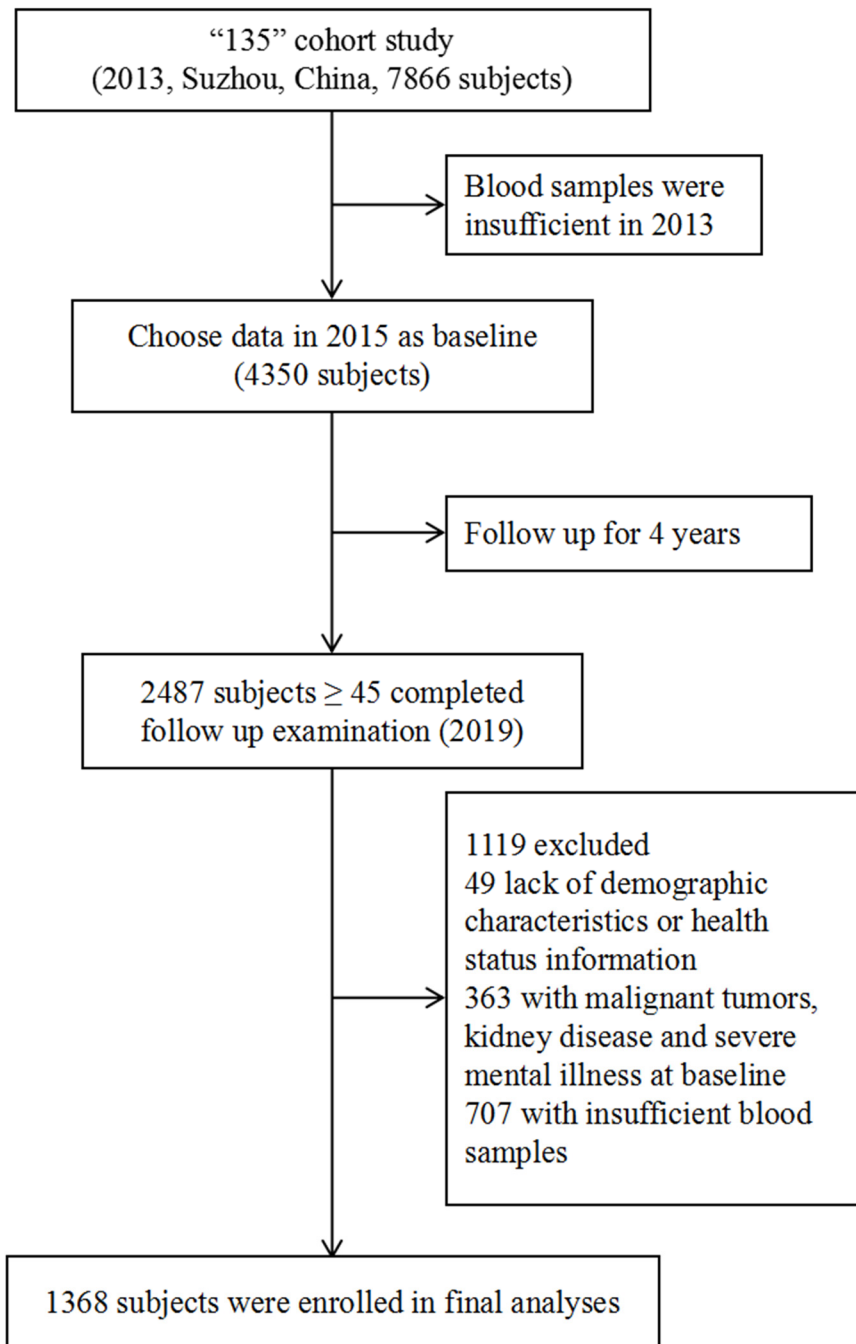

**Supplementary Figure S1.** Study flowchart.

**Supplementary Table S1.** The results of quality assurance (quality control).

| Elements  | Isotope | LOD<br>( $\mu\text{g/L}$ ) | Recovery<br>(%) | RSD<br>(%) | r      |
|-----------|---------|----------------------------|-----------------|------------|--------|
| Lead      | 208     | 0.02                       | 91.5            | 1.9        | 0.9993 |
| Cadmium   | 111     | 0.01                       | 97.6            | 1.8        | 0.9999 |
| Chromium  | 52      | 0.40                       | 101.0           | 1.3        | 0.9999 |
| Copper    | 63      | 0.40                       | 99.7            | 1.2        | 0.9999 |
| Zinc      | 66      | 0.60                       | 89.0            | 2.0        | 0.9998 |
| Selenium  | 82      | 0.10                       | 98.8            | 1.7        | 0.9992 |
| Magnesium | 24      | 0.30                       | 102.5           | 1.4        | 0.9999 |
| Iron      | 57      | 0.01                       | 110.0           | 1.9        | 0.9998 |
| Calcium   | 43      | 0.60                       | 103.2           | 1.6        | 0.9994 |
| Sodium    | 23      | 0.01                       | 102.0           | 1.5        | 0.9996 |
| Potassium | 39      | 0.01                       | 105.3           | 1.7        | 0.9998 |

LOD: limit of detection; RSD: relative sandard deviation.

**Supplementary Table S2.** Spearman correlation between plasma metals. (n=1368)

|           | Lead     | Cadmium | Chromium | Copper  | Zinc    | Selenium | Magnesium | Iron     | Calcium | Sodium  | Potassium |
|-----------|----------|---------|----------|---------|---------|----------|-----------|----------|---------|---------|-----------|
| Lead      | 1        |         |          |         |         |          |           |          |         |         |           |
| Cadmium   | 0.368**  | 1       |          |         |         |          |           |          |         |         |           |
| Chromium  | -0.093** | -0.028  | 1        |         |         |          |           |          |         |         |           |
| Copper    | 0.147**  | 0.212** | 0.310**  | 1       |         |          |           |          |         |         |           |
| Zinc      | 0.332**  | 0.291** | 0.158**  | 0.251** | 1       |          |           |          |         |         |           |
| Selenium  | 0.227**  | 0.164** | -0.201** | 0.321** | 0.086** | 1        |           |          |         |         |           |
| Magnesium | 0.122**  | 0.200** | 0.368**  | 0.516** | 0.296** | 0.067*   | 1         |          |         |         |           |
| Iron      | 0.391**  | 0.329** | -0.044   | 0.327** | 0.236** | 0.708**  | 0.122**   | 1        |         |         |           |
| Calcium   | 0.282**  | 0.250** | 0.361**  | 0.683** | 0.438** | 0.278**  | 0.717**   | 0.366    | 1       |         |           |
| Sodium    | 0.026    | 0.091** | 0.200**  | 0.196** | 0.183** | -0.170** | 0.295**   | -0.201** | 0.335** | 1       |           |
| Potassium | -0.072*  | 0.036   | 0.254**  | 0.020   | 0.129** | -0.226** | 0.102**   | -0.222** | 0.072** | 0.673** | 1         |

\*:  $p < 0.05$ ; \*\*:  $p < 0.01$

**Supplementary Table S3.** Demographic characteristics of included and excluded participants (age  $\geq 45$  years).

| <b>Characteristic</b>                          | <b>Included<br/>participants<br/>(n = 1368)</b> | <b>Excluded<br/>participants<br/>(n = 3621)</b> | <b><i>p</i> value</b> |
|------------------------------------------------|-------------------------------------------------|-------------------------------------------------|-----------------------|
| <b>Age, n (%)</b>                              |                                                 |                                                 |                       |
| 45-60                                          | 792 (57.9)                                      | 2308 (63.7)                                     | 0.177                 |
| > 60                                           | 576 (42.1)                                      | 1313 (36.9)                                     |                       |
| <b>Sex, n (%)</b>                              |                                                 |                                                 |                       |
| Male                                           | 754 (55.1)                                      | 1564 (43.2)                                     | < 0.001*              |
| Female                                         | 614 (44.9)                                      | 2057 (56.8)                                     |                       |
| <b>Marital status, n (%)</b>                   |                                                 |                                                 |                       |
| Married                                        | 1308 (95.6)                                     | 3457 (95.5)                                     | 0.558                 |
| Single                                         | 60 (4.4)                                        | 164 (4.5)                                       |                       |
| <b>Smoking status, n (%)</b>                   |                                                 |                                                 |                       |
| Never smoker                                   | 815 (59.6)                                      | 2582 (71.3)                                     | < 0.001*              |
| Current smoker                                 | 481 (35.2)                                      | 938 (25.9)                                      |                       |
| Former smoker                                  | 72 (5.2)                                        | 101 (2.8)                                       |                       |
| <b>Drinking status, n (%)</b>                  |                                                 |                                                 |                       |
| Frequently                                     | 212 (15.5)                                      | 398 (11.0)                                      | < 0.001*              |
| Occasional                                     | 169 (12.4)                                      | 359 (9.9)                                       |                       |
| Never                                          | 987 (72.1)                                      | 2864 (79.1)                                     |                       |
| <b>BMI, median (IQR),<br/>kg/m<sup>2</sup></b> | 23.7 (21.6, 25.9)                               | 23.3 (20.9, 25.3)                               | 0.038*                |

BMI, body mass index.

| Plasma metals | Principal components |        |        |        |
|---------------|----------------------|--------|--------|--------|
|               | 1                    | 2      | 3      | 4      |
| Calcium       | 0.920                | -0.048 | -0.196 | -0.014 |
| Copper        | 0.809                | -0.020 | -0.202 | -0.234 |
| Magnesium     | 0.799                | -0.149 | -0.062 | -0.180 |
| Iron          | 0.216                | 0.879  | 0.319  | -0.014 |
| Chromium      | 0.144                | 0.828  | 0.439  | -0.084 |
| Potassium     | 0.258                | -0.345 | 0.775  | 0.188  |
| Sodium        | 0.452                | -0.392 | 0.637  | 0.150  |
| Cadmium       | 0.089                | 0.095  | -0.159 | 0.727  |
| Lead          | 0.261                | 0.179  | -0.311 | 0.640  |
| Zinc          | 0.354                | 0.057  | 0.063  | 0.134  |
| Selenium      | 0.340                | 0.182  | -0.450 | -0.100 |

**Supplementary Figure S2.** Plasma metals' factor loadings according to four principal components (n=1368).
